# Supplementary material
Source: PubMed Central journal article supplement (PMC7402401)
Supplement: NIHMS1568846-supplement-1.pdf [file NIHMS1568846-supplement-1.pdf]

## Supplemental Information

# A cardiovascular disease-linked gut microbial metabolite acts via adrenergic receptors

Ina Nemet,<sup>1,2,11</sup> Prasenjit Prasad Saha,<sup>1,2,11</sup> Nilaksh Gupta,<sup>1,2,11</sup> Weifei Zhu,<sup>1,2</sup> Kymberleigh A. Romano,<sup>1,2</sup> Sarah M. Skye,<sup>1,2</sup> Tomas Cajka,<sup>3,9</sup> Maradumane L Mohan,<sup>1</sup> Lin Li,<sup>1,2</sup> Yuping Wu,<sup>4</sup> Masanori Funabashi,<sup>8,10</sup> Amanda E. Ramer-Tait,<sup>6</sup> Sathyamangla Venkata Naga Prasad,<sup>1</sup> Oliver Fiehn,<sup>3</sup> Federico E. Rey,<sup>7</sup> W. H. Wilson Tang,<sup>1,2,5</sup> Michael A. Fischbach,<sup>8</sup> Joseph A. DiDonato,<sup>1,2</sup> and Stanley L. Hazen,<sup>1,2,5,12,\*</sup>

<sup>1</sup>Department of Cardiovascular & Metabolic Sciences, Lerner Research Institute, and <sup>2</sup> Center for Microbiome & Human Health, Cleveland Clinic, Cleveland, OH 44106, USA

<sup>3</sup>West Coast Metabolomics Center, University of California, Davis, CA 95616, USA

<sup>4</sup>Department of Mathematics, Cleveland State University, Cleveland, OH 44115, USA

<sup>5</sup>Heart and Vascular Institute, Cleveland Clinic, Cleveland, OH 44106, USA

<sup>6</sup>Department of Food Science and Technology, University of Nebraska-Lincoln, Lincoln, NE 68588, USA

<sup>7</sup>Department of Bacteriology, University of Wisconsin-Madison, Madison, WI 53706, USA

<sup>8</sup>Department of Bioengineering and ChEM-H, Stanford University, Stanford, CA 94305, USA.

<sup>9</sup>Current address: Institute of Physiology of the Czech Academy of Sciences, Prague, 14200, Czech Republic

<sup>10</sup>Current address: Translational Research Department, Daiichi Sankyo RD Novare Co., Ltd., Tokyo, 134-8630, Japan

<sup>11</sup>These authors contributed equally to this study

<sup>12</sup>Lead Contact

\* Correspondence: hazens@ccf.org

**Table S1.** Baseline characteristics of the patients in the Discovery Cohort. Related to Fig. 1.

| Characteristics                    | Discovery Cohort (n=1,162) |
|------------------------------------|----------------------------|
| Age (years)                        | 64.0 ± 10.9                |
| Sex male (%)                       | 63.7                       |
| T2DM (%)                           | 22.1                       |
| History of hypertension (%)        | 72.1                       |
| History of hyperlipidemia (%)      | 85.8                       |
| Former/current smoking (%)         | 65.4                       |
| History of CAD (%)                 | 75.6                       |
| HDL cholesterol (mg/dL)            | 34.3 (28.5-41.2)           |
| LDL cholesterol (mg/dL)            | 96.0 (80.0-116.0)          |
| C-reactive protein (mg/L)          | 2.3 (1.0-5.4)              |
| eGFR (ml/min/1.73 m <sup>2</sup> ) | 81.1 (68.0-93.7)           |
| Baseline medications (%)           |                            |
| Aspirin (%)                        | 76.8                       |
| ACE inhibitors (%)                 | 49.9                       |
| Beta blocker (%)                   | 65.3                       |
| Statin (%)                         | 61.4                       |

The Discovery Cohort consists of sequential stable subjects who underwent elective diagnostic coronary angiography (cardiac catheterization or coronary computed tomography) for evaluation of coronary artery disease (CAD). MACE (Major Adverse Cardiac Event) was defined as death, nonfatal myocardial infarction, or nonfatal cerebrovascular accident (stroke) following enrollment. Continuous data are presented as mean ± standard deviation or median (interquartile range). Categorical variables are presented as %; T2DM = type 2 diabetes mellitus; eGFR = estimated glomerular filtration rate; ACE = angiotensin-converting-enzyme.

**Table S2.** Top ranked plasma metabolites from the untargeted metabolomics in the Discovery Cohort (n=1,162). Related to Fig. 1.

| Compound                                      | Hazard ratio<br>MACE 3 years<br>Q <sub>4</sub> vs Q <sub>1</sub> |               | T2DM<br>vs<br>non-<br>T2DM | Spearman correlation |        |        |        |                 |        |
|-----------------------------------------------|------------------------------------------------------------------|---------------|----------------------------|----------------------|--------|--------|--------|-----------------|--------|
|                                               | HR                                                               | 5-95%<br>(CI) | p                          | Fasting<br>glucose   |        | HGBA1c |        | Insulin/glucose |        |
|                                               |                                                                  |               |                            | rho                  | p      | rho    | p      | rho             | p      |
| <b><u>Knowns</u></b>                          |                                                                  |               |                            |                      |        |        |        |                 |        |
| PE (38:4)                                     | 2.63                                                             | 1.50-4.61     | 0.0003                     | 0.038                | 0.1974 | 0.150  | 3.5e-7 | 0.051           | 0.0831 |
| TML                                           | 2.53                                                             | 1.44-4.45     | 0.0034                     | 0.114                | 0.0001 | 0.069  | 0.0201 | 0.167           | 1.0e-8 |
| TMAO                                          | 2.42                                                             | 1.44-4.08     | 1.7e-5                     | 0.165                | 2.0e-8 | 0.119  | 5.6e-5 | 0.058           | 0.0724 |
| PC (34:5)                                     | 2.32                                                             | 1.35-3.99     | 0.0003                     | 0.041                | 0.1592 | 0.154  | 1.7e-7 | 0.053           | 0.0721 |
| PE (34:2)                                     | 2.12                                                             | 1.27-3.57     | 2.7e-8                     | 0.113                | 0.0001 | 0.149  | 4.3e-7 | 0.119           | 4.9e-5 |
| <b><u>Unknowns</u></b><br><b>(<i>m/z</i>)</b> |                                                                  |               |                            |                      |        |        |        |                 |        |
| 265.1188                                      | 2.69                                                             | 1.61-4.52     | 0.0002                     | 0.036                | 0.2261 | 0.093  | 0.0018 | -0.031          | 0.2897 |
| 126.0905                                      | 2.60                                                             | 1.53-4.43     | 7.2e-10                    | 0.096                | 0.0011 | 0.111  | 0.0002 | 0.006           | 0.8517 |
| 185.1278                                      | 2.59                                                             | 1.54-4.36     | 2.0e-10                    | 0.108                | 0.0002 | 0.117  | 0.0001 | 0.007           | 0.8200 |
| 906.771                                       | 2.44                                                             | 1.36-4.38     | 0.0289                     | 0.008                | 0.7758 | 0.074  | 0.0130 | 0.047           | 0.1072 |
| 740.5187                                      | 2.37                                                             | 1.38-4.07     | 6.6e-8                     | 0.090                | 0.0022 | 0.149  | 4.5e-7 | 0.048           | 0.1034 |

Table S2 represents the top five metabolites that were structurally identified at the time of study (Knowns) and the top five analytes with unknown structure (Unknowns), Unknowns were characterized by high resolution mass spectrometry of the analyte and retention time (not shown), that had significant Hazard Ratio (HR) for major averse cardiac events (MACE: MI, stroke or death) for fourth quartile (Q<sub>4</sub>) vs first quartile (Q<sub>1</sub>), showed levels that were significantly elevated in diabetics vs non-diabetics, and were poorly associated with multiple indices of glucose control (fasting glucose, HGBA1c and insulin/glucose ratio). CI, 95% confidence interval; HR, Hazard ratio; Q=quartile; T2DM, Type 2 diabetes mellitus; *m/z*, mas to charge ratio.

**Table S3.** Comparison of experimental high resolution collision induced dissociation mass spectral data from the plasma analyte with  $m/z$  265.1188 and phenylacetylglutamine (PAGln). Related to Fig. 1.

| Analyte              | Elemental composition                                         | m/z (mass to charge ratio)                   |                 | Difference ( $\Delta$ ppm) |
|----------------------|---------------------------------------------------------------|----------------------------------------------|-----------------|----------------------------|
|                      |                                                               | Theoretical<br>(Experimental PAGln standard) | Measured        |                            |
| <b>Molecular ion</b> | <b>C<sub>13</sub>H<sub>17</sub>N<sub>2</sub>O<sub>4</sub></b> | <b>265.1188 (265.1185)</b>                   | <b>265.1179</b> | <b>-3.3 (-2.3)</b>         |
| Fragment 1           | C <sub>5</sub> H <sub>11</sub> N <sub>2</sub> O <sub>3</sub>  | 147.0770 (147.0760)                          | 147.0758        | 8.1 (-1.4)                 |
| Fragment 2           | C <sub>8</sub> H <sub>10</sub> N <sub>1</sub> O <sub>1</sub>  | 136.0762 (136.0752)                          | 136.0755        | 5.1 (2.2)                  |
| Fragment 3           | C <sub>5</sub> H <sub>8</sub> N <sub>1</sub> O <sub>3</sub>   | 130.0504 (130.0496)                          | 130.0497        | 5.3 (0.8)                  |
| Fragment 4           | C <sub>7</sub> H <sub>7</sub>                                 | 91.0548 (91.0545)                            | 91.0547         | 1.0 (2.2)                  |
| Fragment 5           | C <sub>4</sub> H <sub>6</sub> N <sub>1</sub> O <sub>1</sub>   | 84.0449 (84.0449)                            | 84.0450         | -1.2 (-1.2)                |

High resolution mass spectrometry data were collected for the unknown compound with  $m/z$  265.1188 (in the current experiment  $m/z$  265.1179) and compared with the theoretical values and experimental values obtained from the pure phenylacetylglutamine (PAGln) standard (values shown in parenthesis). Difference between values is expressed in parts per million (ppm).

**Table S4.** Baseline characteristics of patients in the Validation Cohort. Related to Fig. 1.

| Characteristics                    | Validation Cohort (n=4,000) |
|------------------------------------|-----------------------------|
| Age (years)                        | 62.9 ± 10.9                 |
| Sex male (%)                       | 64.4                        |
| Diabetes mellitus (%)              | 31.5                        |
| History of hypertension (%)        | 71.7                        |
| History of hyperlipidemia (%)      | 84.2                        |
| Former/current smoking (%)         | 65.1                        |
| History of CAD (%)                 | 72.4                        |
| HDL cholesterol (mg/dL)            | 34.1 (28.3-41.2)            |
| LDL cholesterol (mg/dL)            | 96.0 (78.0-117.0)           |
| C-reactive protein (mg/L)          | 2.4 (1.0-5.9)               |
| eGFR (ml/min/1.73 m <sup>2</sup> ) | 82.1 (68.8-94.8)            |
| Baseline medications (%)           |                             |
| Aspirin (%)                        | 73.8                        |
| ACE inhibitors (%)                 | 50.1                        |
| Beta blocker (%)                   | 63.1                        |
| Statin (%)                         | 60.2                        |

The Validation Cohort consists of sequential stable subjects who underwent elective diagnostic coronary angiography (cardiac catheterization or coronary computed tomography) for evaluation of coronary artery disease (CAD). MACE (Major Adverse Cardia Events) was defined as death, nonfatal myocardial infarction, or nonfatal cerebrovascular accident (stroke) following enrollment. Continuous data are presented as mean ± standard deviation or median (interquartile range). Categorical variables are presented as %; T2DM = type 2 diabetes mellitus; eGFR = estimated glomerular filtration rate; ACE = angiotensin-converting-enzyme.

**Table S5.** Distribution of plasma PAGIn levels in the Validation Cohort. Related to Fig. 1.

| Phenylacetylglutamine ( $\mu\text{M}$ ) |                        |                                    |               |                            |               |                        |               |
|-----------------------------------------|------------------------|------------------------------------|---------------|----------------------------|---------------|------------------------|---------------|
| PAGIn range (%)                         | Whole cohort (n=4,000) | History of CVD in the whole cohort |               | History of CVD in non-T2DM |               | History of CVD in T2DM |               |
|                                         |                        | No (n=811)                         | Yes (n=3,189) | No (n=650)                 | Yes (n=2,089) | No (n=161)             | Yes (n=1,100) |
| Min                                     | 0.081                  | 0.081                              | 0.108         | 0.081                      | 0.109         | 0.311                  | 0.108         |
| 5                                       | 0.808                  | 0.745                              | 0.833         | 0.767                      | 0.797         | 0.622                  | 1.005         |
| 10                                      | 1.112                  | 0.951                              | 1.154         | 0.945                      | 1.084         | 0.975                  | 1.340         |
| 25                                      | 1.825                  | 1.572                              | 1.912         | 1.540                      | 1.806         | 1.775                  | 2.137         |
| 50                                      | 3.007                  | 2.548                              | 3.190         | 2.508                      | 2.923         | 2.752                  | 3.685         |
| 75                                      | 4.893                  | 3.945                              | 5.094         | 3.897                      | 4.656         | 4.400                  | 5.962         |
| 90                                      | 7.444                  | 6.134                              | 7.784         | 5.799                      | 6.946         | 6.525                  | 9.425         |
| 95                                      | 9.937                  | 7.862                              | 10.435        | 8.036                      | 9.047         | 7.382                  | 13.100        |
| 97.5                                    | 13.691                 | 10.220                             | 14.519        | 9.948                      | 12.161        | 10.35                  | 20.282        |
| 99                                      | 23.716                 | 14.374                             | 25.268        | 13.392                     | 16.573        | 12.98                  | 70.298        |
| Max                                     | 267.1                  | 152.1                              | 267.1         | 152.1                      | 267.1         | 18.17                  | 217.1         |

Results in the Table show plasma PAGIn concentrations at the indicated percentile cut off (in  $\mu\text{M}$ ) within the whole cohort in the indicated subgroups. CVD, cardiovascular disease; T2DM, type 2 diabetes mellitus.
